# Supplementary material
Source: PubMed Central journal article supplement (PMC6962029)
Supplement: jciinsight-4-131886-s103.pdf [file jciinsight-4-131886-s103.pdf]

# Suppl. Figure 1

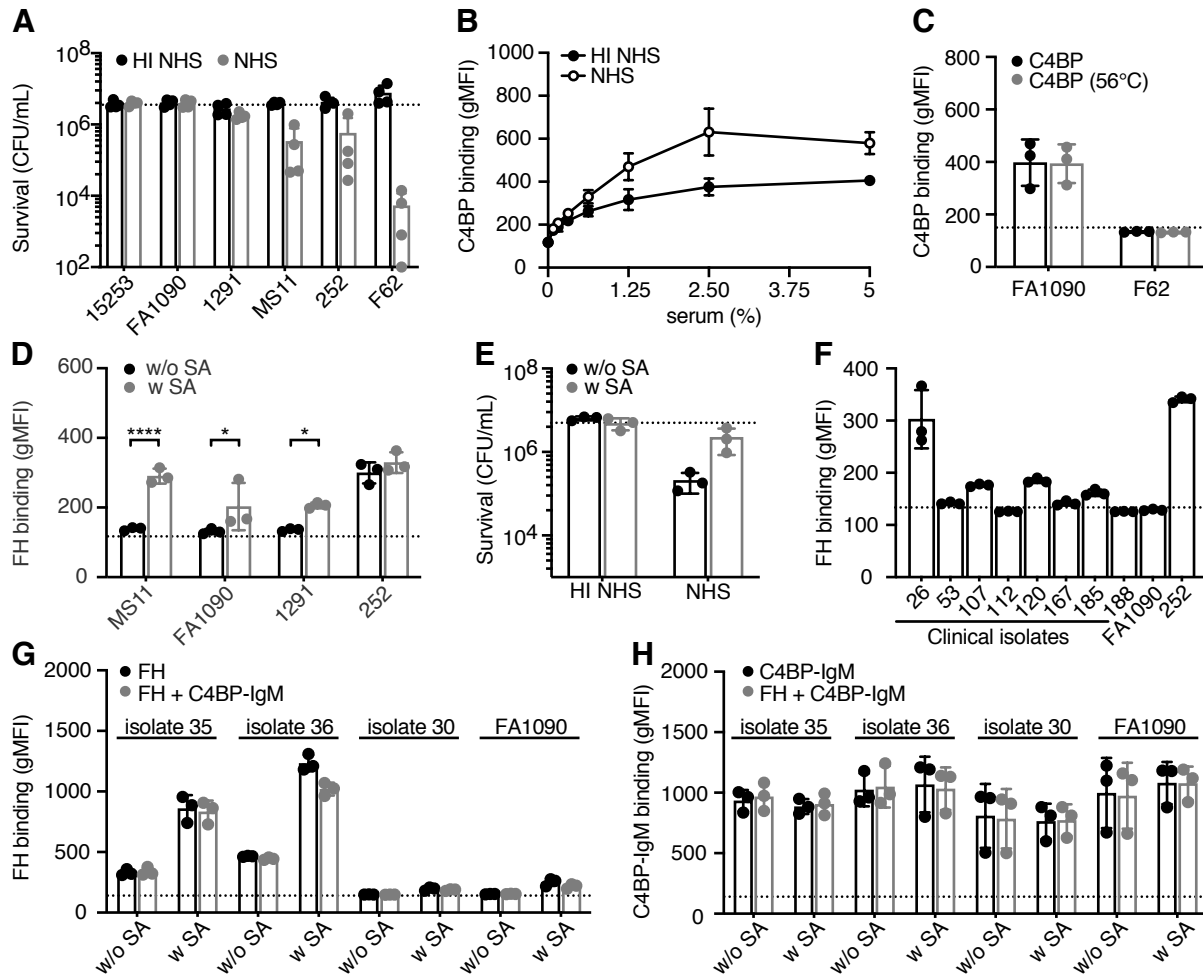

**Supplemental Figure 1. Survival and binding of complement inhibitors C4BP and FH to *Neisseria gonorrhoeae*.** **A**) Survival of 6 laboratory strains of *Neisseria gonorrhoeae* to killing by 10% NHS. Heat inactivated NHS (HI NHS) is used as negative control. Dotted line corresponds to the starting number of bacteria used in the assay. **B**) C4BP binding to *N. gonorrhoeae* FA1090 from NHS or HI NHS. Dots represent mean  $\pm$  SD of three independently performed repeats. **C**) Binding of C4BP or 56°C-treated C4BP to *N. gonorrhoeae* FA1090 and F62. **D**) Binding of FH to four laboratory strains of *N. gonorrhoeae* in the presence (w SA) or in the absence (w/o SA) of sialylation. Statistics  $p$  values were performed by two-way ANOVA with Sidak's multiple comparisons test. \* $p < 0.05$ , \*\*\*\* $p < 0.0001$  as indicated. **E**) Survival of *N. gonorrhoeae* MS11 to killing by 10% NHS in the presence (w SA) or in the absence (w/o SA) of sialylation. **F**) FH binding of non sialylated serum resistant gonococcal clinical isolates which are not binding C4BP (identified in Fig. 1F). Dotted line refers to cut-off for positivity (133.5 gMFI) calculated as mean + 3SD of the unspecific background of signal obtained for strain FA1090 that does not bind FH. Binding of FH (**G**) or C4BP-IgM (**H**) or both to gonococcal strains 30, 35, 36 and FA1090 in the presence (w SA) or in the absence (w/o SA) of sialylation. In all scatter plots, bars display mean  $\pm$  SD of at least three independently performed experiments. Horizontal dotted line refers to starting amount of bacteria used in the assay (**A** and **E**), or gMFI average value in the absence of protein (**C**, **D**, **G** and **H**).

## Suppl. Figure 2

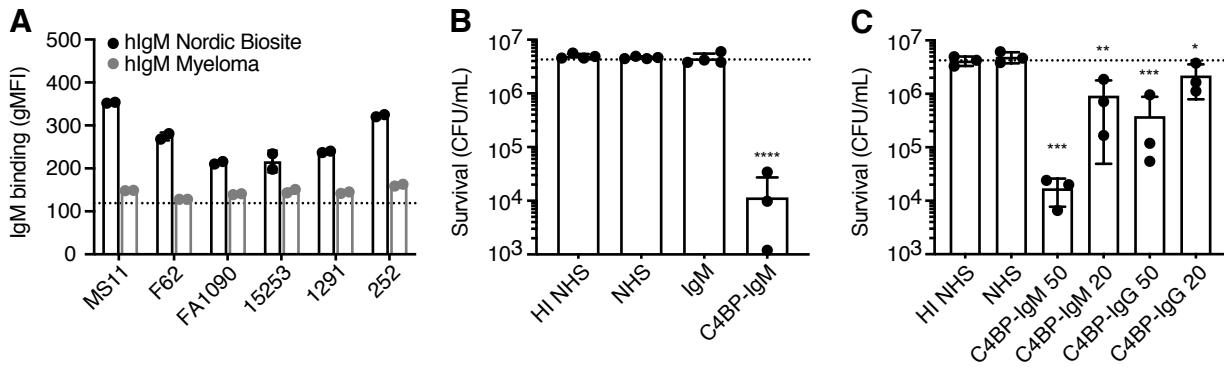

**Supplemental Figure 2. Binding and killing of *Neisseria gonorrhoeae* in the presence of human IgM and C4BP-IgG fusion protein.** **A)** Binding of 50  $\mu\text{g}/\text{mL}$  of human IgM to 6 laboratory strains of *N. gonorrhoeae*. Two preparations of IgM were tested: human IgM purified from normal human plasma (hIgM Nordic Biosite); human IgM purified from myeloma human plasma (hIgM Myeloma). Dotted line refers to gMFI average value in the absence of the proteins. **B)** Survival of *N. gonorrhoeae* FA1090 to killing by 10% NHS in the presence of either 50  $\mu\text{g}/\text{mL}$  human IgM from myeloma plasma or 50  $\mu\text{g}/\text{mL}$  C4BP-IgM. Heat inactivated NHS (HI NHS) was used as negative control. **C)** Survival of *N. gonorrhoeae* FA1090 to killing by 10% NHS in the presence of 20 or 50  $\mu\text{g}/\text{mL}$  of either C4BP-IgM or C4BP-IgG. In both **B** and **C** graphs dotted lines correspond to the starting number of bacteria used in the assay, and each bar represents the mean  $\pm$  SD of at least three independently performed experiments. In all graphs differences were compared using one-way ANOVA with Dunnett's multiple comparisons test considering NHS as reference. \* $p < 0.05$ , \*\* $p < 0.01$ , \*\*\* $p < 0.005$ , \*\*\*\* $p < 0.0001$ .

**Table I. Phenotypic characteristic of laboratory strains of *Neisseria gonorrhoeae***

| <b>Strain</b> | <b>PorB subclass</b> | <b>C4BP binding</b> | <b>FH binding</b>    | <b>Serum resistance</b> |
|---------------|----------------------|---------------------|----------------------|-------------------------|
| 15253         | PorB1a               | yes                 | yes                  | yes                     |
| FA1090        | PorB1b               | yes                 | only when sialylated | yes                     |
| MS11          | PorB1b               | yes                 | only when sialylated | yes                     |
| 1291          | PorB1b               | yes                 | only when sialylated | yes                     |
| 252           | PorB1b               | no                  | yes                  | yes                     |
| F62           | PorB1b               | no                  | only when sialylated | no                      |

PorB, Porin B protein; C4BP, C4b-binding protein; FH, Factor H
